# Supplementary material for: Controlling product selectivity and catalyst lifetime by altering acid strength, cavity size of SAPO, and diffusion rate of methanol in the MTO reaction: DFT and MD calculations
Source: Royal Society of Chemistry journal article supplement (doi:10.1039/d3cp05455a), 2024-01-01
Supplement: d3cp05455a2.pdf [file d3cp05455a2.pdf]

### Supporting information

Control the products selectivity and catalyst lifetime by acid strength, cavity size of SAPO, and diffusion rate of methanol in the MTO process:

DFT and MD calculation

Saeedeh Soheili, and Ali Nakhaei Pour\*

Department of Chemistry, Faculty of Science, Ferdowsi University of Mashhad, Mashhad 9177948974, Iran.

\* Corresponding author:

Email: [a.nakhaei@um.ac.ir](mailto:a.nakhaei@um.ac.ir), [nakhaeipoura@yahoo.com](mailto:nakhaeipoura@yahoo.com)

#### Computational details

Considering the ZPE and entropy corrections, the free energies of adsorption,  $\Delta G_{\text{ads}}$ , can be obtained by following equation:

$$\Delta G_{\text{ads}} = \Delta E + \Delta \text{ZPE} - T\Delta S$$

Detailed calculation:

(castep theoretical of material studio)

#### Thermodynamic calculations

The results of a calculation of phonon spectra can be used to compute energy (E), entropy (S), free energy (F), and lattice heat capacity (Cv) as functions of temperature. The CASTEP total energy yields the total electronic energy at 0 K. The vibrational contributions to the thermodynamic properties are evaluated to compute E, S, F, and Cv at finite temperatures as discussed below.

Thermodynamic calculations can be performed only if the system is in the ground state, that is, geometry optimization is fully converged. This means that all the phonon eigenfrequencies must be real and non-negative.

When you perform a vibrational analysis with CASTEP the results of the thermodynamic calculations can be visualized using the thermodynamic analysis tools.

The formulas below are based on work by Baroni et al. (2001).

The temperature dependence of the energy is given by:

$$E(T) = E_{tot} + E_{zp} + \int \frac{\hbar\omega}{\exp\left(\frac{\hbar\omega}{kT}\right) - 1} F(\omega) d\omega$$

where  $E_{zp}$  is the zero point vibrational energy,  $k$  is the Boltzmann constant,  $\hbar$  is the Planck constant and  $F(\omega)$  is the phonon density of states.  $E_{zp}$  can be evaluated as:

$$E_{zp} = \frac{1}{2} \int F(\omega) \hbar\omega d\omega$$

The vibrational contribution to the free energy,  $F$ , is given by:

$$F(T) = E_{tot} + E_{zp} + kT \int F(\omega) \ln \left[ 1 - \exp\left(-\frac{\hbar\omega}{kT}\right) \right] d\omega$$

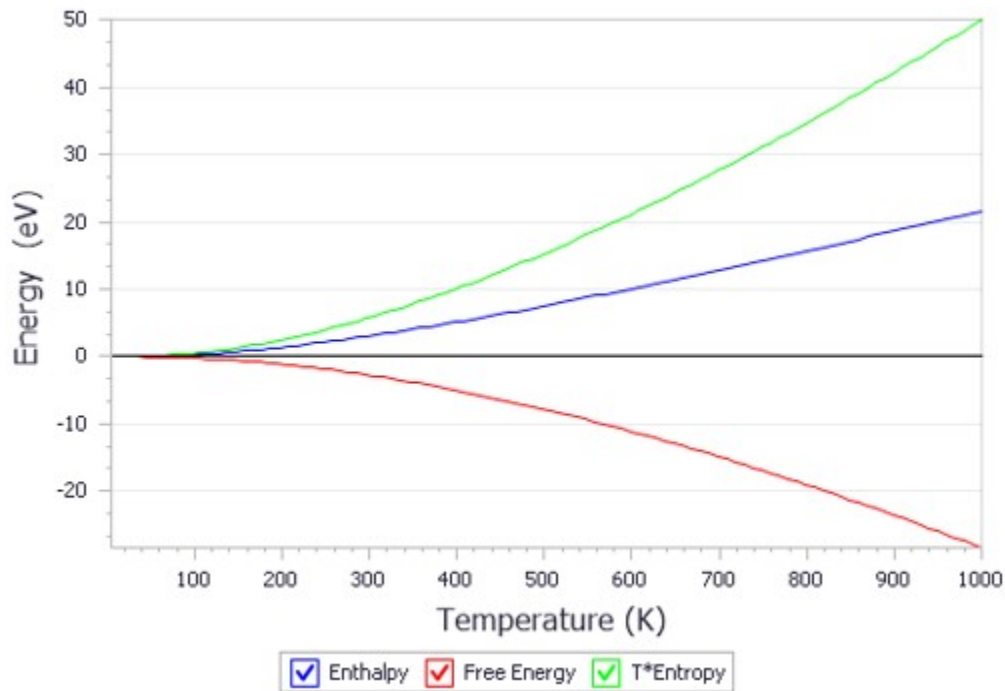

Fig 1s: Castep thermodynamic properties of SAPO-34 structure (TS<sub>1-2</sub>).

Table 1S. Parameters of thermodynamic Castep of SAPO- 34 structure.

| T(K)     | H( eV)   | T(K)     | G( eV)    | T(K)     | TS( eV.K) |
|----------|----------|----------|-----------|----------|-----------|
| 5        | 9.19E-05 | 5        | -2.43E-05 | 5        | 0.000116  |
| 15.05051 | 0.002871 | 15.05051 | -0.00142  | 15.05051 | 0.004292  |
| 25.10101 | 0.011259 | 25.10101 | -0.00625  | 25.10101 | 0.01751   |
| 35.15152 | 0.027124 | 35.15152 | -0.01582  | 35.15152 | 0.042941  |
| 45.20202 | 0.051347 | 45.20202 | -0.03106  | 45.20202 | 0.082412  |
| 55.25253 | 0.084162 | 55.25253 | -0.05263  | 55.25253 | 0.136796  |
| 65.30303 | 0.125495 | 65.30303 | -0.08094  | 65.30303 | 0.206436  |
| 75.35354 | 0.175184 | 75.35354 | -0.11625  | 75.35354 | 0.291432  |
| 85.40404 | 0.233061 | 85.40404 | -0.15873  | 85.40404 | 0.391788  |
| 95.45455 | 0.29897  | 95.45455 | -0.20849  | 95.45455 | 0.50746   |
| 105.5051 | 0.372751 | 105.5051 | -0.26561  | 105.5051 | 0.638358  |
| 115.5556 | 0.454234 | 115.5556 | -0.33012  | 115.5556 | 0.784355  |
| 125.6061 | 0.543233 | 125.6061 | -0.40205  | 125.6061 | 0.945283  |
| 135.6566 | 0.639547 | 135.6566 | -0.48139  | 135.6566 | 1.120941  |
| 145.7071 | 0.742961 | 145.7071 | -0.56814  | 145.7071 | 1.3111    |
| 155.7576 | 0.853257 | 155.7576 | -0.66226  | 155.7576 | 1.515513  |
| 165.8081 | 0.970213 | 165.8081 | -0.76371  | 165.8081 | 1.733919  |
| 175.8586 | 1.093608 | 175.8586 | -0.87244  | 175.8586 | 1.966051  |
| 185.9091 | 1.223227 | 185.9091 | -0.98841  | 185.9091 | 2.211637  |
| 195.9596 | 1.35886  | 195.9596 | -1.11155  | 195.9596 | 2.47041   |
| 206.0101 | 1.500304 | 206.0101 | -1.2418   | 206.0101 | 2.7421    |
| 216.0606 | 1.647365 | 216.0606 | -1.37908  | 216.0606 | 3.026447  |
| 226.1111 | 1.799856 | 226.1111 | -1.52334  | 226.1111 | 3.323192  |
| 236.1616 | 1.957598 | 236.1616 | -1.67449  | 236.1616 | 3.632083  |
| 246.2121 | 2.120416 | 246.2121 | -1.83246  | 246.2121 | 3.952873  |
| 256.2626 | 2.288144 | 256.2626 | -1.99718  | 256.2626 | 4.285321  |
| 266.3131 | 2.460622 | 266.3131 | -2.16857  | 266.3131 | 4.62919   |
| 276.3636 | 2.637693 | 276.3636 | -2.34656  | 276.3636 | 4.984251  |
| 286.4141 | 2.819207 | 286.4141 | -2.53107  | 286.4141 | 5.350275  |
| 296.4646 | 3.005018 | 296.4646 | -2.72202  | 296.4646 | 5.727041  |
| 306.5152 | 3.194983 | 306.5152 | -2.91935  | 306.5152 | 6.114332  |
| 316.5657 | 3.388964 | 316.5657 | -3.12297  | 316.5657 | 6.511935  |
| 326.6162 | 3.586828 | 326.6162 | -3.33281  | 326.6162 | 6.919641  |
| 336.6667 | 3.788442 | 336.6667 | -3.5488   | 336.6667 | 7.337246  |
| 346.7172 | 3.993682 | 346.7172 | -3.77087  | 346.7172 | 7.764549  |
| 356.7677 | 4.202423 | 356.7677 | -3.99893  | 356.7677 | 8.201354  |
| 366.8182 | 4.414546 | 366.8182 | -4.23292  | 366.8182 | 8.64747   |
| 376.8687 | 4.629935 | 376.8687 | -4.47277  | 376.8687 | 9.102709  |
| 386.9192 | 4.848477 | 386.9192 | -4.71841  | 386.9192 | 9.566888  |

---

| T(K)     | H( eV)   | T(K)     | G( eV)   | T(K)     | TS( eV.K) |
|----------|----------|----------|----------|----------|-----------|
| 396.9697 | 5.070064 | 396.9697 | -4.96976 | 396.9697 | 10.03983  |
| 407.0202 | 5.29459  | 407.0202 | -5.22677 | 407.0202 | 10.52136  |
| 417.0707 | 5.521952 | 417.0707 | -5.48935 | 417.0707 | 11.0113   |
| 427.1212 | 5.752053 | 427.1212 | -5.75744 | 427.1212 | 11.50949  |
| 437.1717 | 5.984798 | 437.1717 | -6.03098 | 437.1717 | 12.01578  |
| 447.2222 | 6.220093 | 447.2222 | -6.3099  | 447.2222 | 12.52999  |
| 457.2727 | 6.457852 | 457.2727 | -6.59414 | 457.2727 | 13.05199  |
| 467.3232 | 6.697988 | 467.3232 | -6.88363 | 467.3232 | 13.58161  |
| 477.3737 | 6.940419 | 477.3737 | -7.1783  | 477.3737 | 14.11872  |
| 487.4242 | 7.185067 | 487.4242 | -7.47811 | 487.4242 | 14.66318  |
| 497.4747 | 7.431855 | 497.4747 | -7.78298 | 497.4747 | 15.21484  |
| 507.5253 | 7.68071  | 507.5253 | -8.09286 | 507.5253 | 15.77357  |
| 517.5758 | 7.931562 | 517.5758 | -8.40769 | 517.5758 | 16.33925  |
| 527.6263 | 8.184343 | 527.6263 | -8.72741 | 527.6263 | 16.91175  |
| 537.6768 | 8.438988 | 537.6768 | -9.05196 | 537.6768 | 17.49095  |
| 547.7273 | 8.695435 | 547.7273 | -9.38129 | 547.7273 | 18.07672  |
| 557.7778 | 8.953625 | 557.7778 | -9.71534 | 557.7778 | 18.66896  |
| 567.8283 | 9.213499 | 567.8283 | -10.0541 | 567.8283 | 19.26755  |
| 577.8788 | 9.475002 | 577.8788 | -10.3974 | 577.8788 | 19.87239  |
| 587.9293 | 9.738083 | 587.9293 | -10.7453 | 587.9293 | 20.48336  |
| 597.9798 | 10.00269 | 597.9798 | -11.0977 | 597.9798 | 21.10037  |
| 608.0303 | 10.26877 | 608.0303 | -11.4545 | 608.0303 | 21.72332  |
| 618.0808 | 10.53629 | 618.0808 | -11.8158 | 618.0808 | 22.35211  |
| 628.1313 | 10.80518 | 628.1313 | -12.1815 | 628.1313 | 22.98664  |
| 638.1818 | 11.07542 | 638.1818 | -12.5514 | 638.1818 | 23.62684  |
| 648.2323 | 11.34697 | 648.2323 | -12.9256 | 648.2323 | 24.27259  |
| 658.2828 | 11.61977 | 658.2828 | -13.3041 | 658.2828 | 24.92383  |
| 668.3333 | 11.89379 | 668.3333 | -13.6867 | 668.3333 | 25.58047  |
| 678.3838 | 12.169   | 678.3838 | -14.0734 | 678.3838 | 26.24242  |
| 688.4343 | 12.44537 | 688.4343 | -14.4642 | 688.4343 | 26.90961  |
| 698.4848 | 12.72285 | 698.4848 | -14.8591 | 698.4848 | 27.58196  |
| 708.5354 | 13.00141 | 708.5354 | -15.258  | 708.5354 | 28.25939  |
| 718.5859 | 13.28102 | 718.5859 | -15.6608 | 718.5859 | 28.94184  |
| 728.6364 | 13.56166 | 728.6364 | -16.0676 | 728.6364 | 29.62922  |
| 738.6869 | 13.8433  | 738.6869 | -16.4782 | 738.6869 | 30.32148  |
| 748.7374 | 14.1259  | 748.7374 | -16.8926 | 748.7374 | 31.01854  |
| 758.7879 | 14.40943 | 758.7879 | -17.3109 | 758.7879 | 31.72035  |
| 768.8384 | 14.69389 | 768.8384 | -17.7329 | 768.8384 | 32.42682  |

---

---

| T(K)     | H( eV)   | T(K)     | G( eV)   | T(K)     | TS( eV.K) |
|----------|----------|----------|----------|----------|-----------|
| 788.9394 | 15.26543 | 788.9394 | -18.5881 | 788.9394 | 33.85356  |
| 798.9899 | 15.55248 | 798.9899 | -19.0212 | 798.9899 | 34.57369  |
| 809.0404 | 15.84034 | 809.0404 | -19.4579 | 809.0404 | 35.29826  |
|          |          |          |          |          | 36.02721  |
| 819.0909 | 16.12901 | 819.0909 | -19.8982 | 819.0909 |           |
| 829.1414 | 16.41845 | 829.1414 | -20.342  | 829.1414 | 36.76049  |
| 839.1919 | 16.70864 | 839.1919 | -20.7894 | 839.1919 | 37.49803  |
| 879.3939 | 17.87663 | 879.3939 | -22.6132 | 879.3939 | 40.48988  |
| 889.4444 | 18.17033 | 889.4444 | -23.0777 | 889.4444 | 41.24801  |
| 899.4949 | 18.46469 | 899.4949 | -23.5454 | 899.4949 | 42.01011  |
| 909.5455 | 18.75968 | 909.5455 | -24.0165 | 909.5455 | 42.77615  |
| 919.596  | 19.0553  | 919.596  | -24.4908 | 919.596  | 43.54606  |
| 929.6465 | 19.35151 | 929.6465 | -24.9683 | 929.6465 | 44.31982  |
| 939.697  | 19.64832 | 939.697  | -25.4491 | 939.697  | 45.09737  |
| 949.7475 | 19.94571 | 949.7475 | -25.933  | 949.7475 | 45.87868  |
| 959.798  | 20.24366 | 959.798  | -26.42   | 959.798  | 46.6637   |
| 969.8485 | 20.54216 | 969.8485 | -26.9102 | 969.8485 | 47.4524   |
| 979.899  | 20.84119 | 979.899  | -27.4035 | 979.899  | 48.24473  |
| 989.9495 | 21.14076 | 989.9495 | -27.8999 | 989.9495 | 49.04065  |
| 1000     | 21.44084 | 1000     | -28.3993 | 1000     | 49.84014  |

---

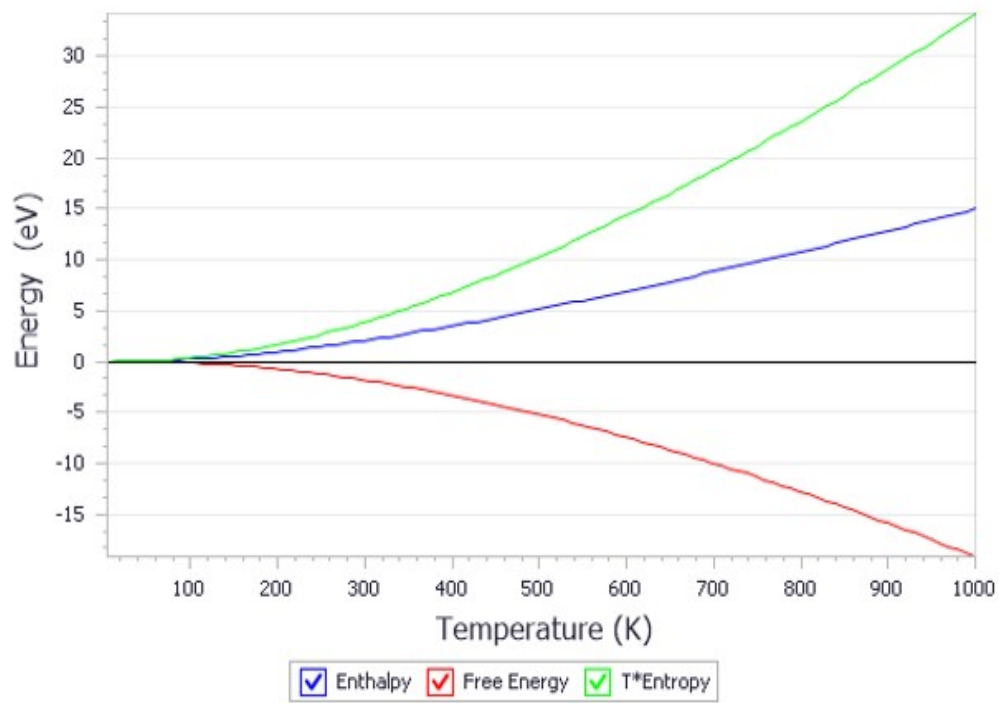

Fig 2S: Castep thermodynamic properties of SAPO-18 structure (TS<sub>1-2</sub>).

Table 2S. Parameters of thermodynamic Castep of SAPO- 18 structure.

|          | T(K)     | H( eV)   | T(K)      | G( eV)   | T(K)     | TS( eV.K) |
|----------|----------|----------|-----------|----------|----------|-----------|
| 5        | 7.13E-05 | 5        | -2.33E-05 | 5        | 9.45E-05 |           |
| 15.05051 | 0.001441 | 15.05051 | -0.0008   | 15.05051 | 0.002238 |           |
| 25.10101 | 0.005935 | 25.10101 | -0.00332  | 25.10101 | 0.009257 |           |
| 35.15152 | 0.015124 | 35.15152 | -0.00849  | 35.15152 | 0.023614 |           |
| 45.20202 | 0.029836 | 45.20202 | -0.01703  | 45.20202 | 0.046869 |           |
| 55.25253 | 0.050348 | 55.25253 | -0.02947  | 55.25253 | 0.079822 |           |
| 65.30303 | 0.076688 | 65.30303 | -0.04617  | 65.30303 | 0.122857 |           |
| 75.35354 | 0.1088   | 75.35354 | -0.06736  | 75.35354 | 0.176157 |           |
| 85.40404 | 0.146605 | 85.40404 | -0.09321  | 85.40404 | 0.239811 |           |
| 95.45455 | 0.190015 | 95.45455 | -0.12383  | 95.45455 | 0.313847 |           |
| 105.5051 | 0.238931 | 105.5051 | -0.15932  | 105.5051 | 0.39825  |           |
| 115.5556 | 0.293239 | 115.5556 | -0.19972  | 115.5556 | 0.492961 |           |
| 125.6061 | 0.35281  | 125.6061 | -0.24508  | 125.6061 | 0.597889 |           |
| 135.6566 | 0.417506 | 135.6566 | -0.29541  | 135.6566 | 0.712914 |           |
| 145.7071 | 0.487177 | 145.7071 | -0.35072  | 145.7071 | 0.837892 |           |
| 155.7576 | 0.561671 | 155.7576 | -0.411    | 155.7576 | 0.972667 |           |
| 165.8081 | 0.640832 | 165.8081 | -0.47623  | 165.8081 | 1.117067 |           |
| 175.8586 | 0.72451  | 175.8586 | -0.54641  | 175.8586 | 1.27092  |           |
| 185.9091 | 0.812554 | 185.9091 | -0.62149  | 185.9091 | 1.434048 |           |
| 195.9596 | 0.904821 | 195.9596 | -0.70145  | 195.9596 | 1.606272 |           |
| 206.0101 | 1.001171 | 206.0101 | -0.78625  | 206.0101 | 1.787419 |           |
| 216.0606 | 1.101474 | 216.0606 | -0.87584  | 216.0606 | 1.977315 |           |
| 226.1111 | 1.2056   | 226.1111 | -0.97019  | 226.1111 | 2.175791 |           |
| 236.1616 | 1.313429 | 236.1616 | -1.06925  | 236.1616 | 2.382681 |           |
| 246.2121 | 1.424845 | 246.2121 | -1.17298  | 246.2121 | 2.597824 |           |
| 256.2626 | 1.539735 | 256.2626 | -1.28133  | 256.2626 | 2.82106  |           |
| 266.3131 | 1.657991 | 266.3131 | -1.39424  | 266.3131 | 3.052235 |           |
| 276.3636 | 1.779508 | 276.3636 | -1.51169  | 276.3636 | 3.291197 |           |
| 286.4141 | 1.904186 | 286.4141 | -1.63361  | 286.4141 | 3.537797 |           |
| 296.4646 | 2.031927 | 296.4646 | -1.75996  | 296.4646 | 3.791888 |           |
| 306.5152 | 2.162635 | 306.5152 | -1.89069  | 306.5152 | 4.053328 |           |
| 316.5657 | 2.296216 | 316.5657 | -2.02576  | 316.5657 | 4.321975 |           |
| 326.6162 | 2.432582 | 326.6162 | -2.16511  | 326.6162 | 4.597692 |           |
| 336.6667 | 2.571643 | 336.6667 | -2.3087   | 336.6667 | 4.880342 |           |
| 346.7172 | 2.713313 | 346.7172 | -2.45648  | 346.7172 | 5.169793 |           |
| 356.7677 | 2.85751  | 356.7677 | -2.6084   | 356.7677 | 5.465915 |           |
| 366.8182 | 3.004152 | 366.8182 | -2.76443  | 366.8182 | 5.768577 |           |
| 376.8687 | 3.15316  | 376.8687 | -2.9245   | 376.8687 | 6.077657 |           |
| 386.9192 | 3.304456 | 386.9192 | -3.08857  | 386.9192 | 6.39303  |           |
| 396.9697 | 3.457967 | 396.9697 | -3.25661  | 396.9697 | 6.714576 |           |

|          | T(K)     | H(eV)    | T(K)     | G(eV)    | T(K)     | TS(eV.K) |
|----------|----------|----------|----------|----------|----------|----------|
| 407.0202 | 3.613619 | 407.0202 | -3.42856 | 407.0202 | 7.042178 |          |
| 417.0707 | 3.771342 | 417.0707 | -3.60438 | 417.0707 | 7.37572  |          |
| 427.1212 | 3.931069 | 427.1212 | -3.78402 | 427.1212 | 7.715091 |          |
| 437.1717 | 4.092733 | 437.1717 | -3.96745 | 437.1717 | 8.060181 |          |
| 447.2222 | 4.256271 | 447.2222 | -4.15461 | 447.2222 | 8.410883 |          |
| 457.2727 | 4.42162  | 457.2727 | -4.34547 | 457.2727 | 8.767092 |          |
| 467.3232 | 4.588722 | 467.3232 | -4.53999 | 467.3232 | 9.128708 |          |
| 477.3737 | 4.757519 | 477.3737 | -4.73811 | 477.3737 | 9.495632 |          |
| 487.4242 | 4.927956 | 487.4242 | -4.93981 | 487.4242 | 9.867766 |          |
| 497.4747 | 5.09998  | 497.4747 | -5.14504 | 497.4747 | 10.24502 |          |
| 507.5253 | 5.273539 | 507.5253 | -5.35376 | 507.5253 | 10.6273  |          |
| 517.5758 | 5.448583 | 517.5758 | -5.56593 | 517.5758 | 11.01451 |          |
| 527.6263 | 5.625066 | 527.6263 | -5.78151 | 527.6263 | 11.40658 |          |
| 537.6768 | 5.802942 | 537.6768 | -6.00047 | 537.6768 | 11.80342 |          |
| 547.7273 | 5.982166 | 547.7273 | -6.22277 | 547.7273 | 12.20494 |          |
| 557.7778 | 6.162696 | 557.7778 | -6.44837 | 557.7778 | 12.61107 |          |
| 567.8283 | 6.344492 | 567.8283 | -6.67723 | 567.8283 | 13.02172 |          |
| 577.8788 | 6.527515 | 577.8788 | -6.90932 | 577.8788 | 13.43684 |          |
| 587.9293 | 6.711727 | 587.9293 | -7.14461 | 587.9293 | 13.85634 |          |
| 597.9798 | 6.897092 | 597.9798 | -7.38305 | 597.9798 | 14.28015 |          |
| 608.0303 | 7.083575 | 608.0303 | -7.62462 | 608.0303 | 14.7082  |          |
| 618.0808 | 7.271144 | 618.0808 | -7.86929 | 618.0808 | 15.14043 |          |
| 628.1313 | 7.459766 | 628.1313 | -8.117   | 628.1313 | 15.57677 |          |
| 638.1818 | 7.649411 | 638.1818 | -8.36775 | 638.1818 | 16.01716 |          |
| 648.2323 | 7.840049 | 648.2323 | -8.62149 | 648.2323 | 16.46154 |          |
| 658.2828 | 8.031652 | 658.2828 | -8.8782  | 658.2828 | 16.90985 |          |
| 668.3333 | 8.224193 | 668.3333 | -9.13783 | 668.3333 | 17.36203 |          |
| 678.3838 | 8.417645 | 678.3838 | -9.40037 | 678.3838 | 17.81802 |          |
| 688.4343 | 8.611983 | 688.4343 | -9.66578 | 688.4343 | 18.27777 |          |
| 698.4848 | 8.807183 | 698.4848 | -9.93404 | 698.4848 | 18.74122 |          |
| 708.5354 | 9.003222 | 708.5354 | -10.2051 | 708.5354 | 19.20833 |          |
| 718.5859 | 9.200077 | 718.5859 | -10.479  | 718.5859 | 19.67904 |          |
| 728.6364 | 9.397727 | 728.6364 | -10.7556 | 728.6364 | 20.15331 |          |
| 738.6869 | 9.596151 | 738.6869 | -11.0349 | 738.6869 | 20.63108 |          |
| 748.7374 | 9.79533  | 748.7374 | -11.317  | 748.7374 | 21.11231 |          |
| 758.7879 | 9.995242 | 758.7879 | -11.6017 | 758.7879 | 21.59696 |          |
| 768.8384 | 10.19587 | 768.8384 | -11.8891 | 768.8384 | 22.08497 |          |
| 778.8889 | 10.3972  | 778.8889 | -12.1791 | 778.8889 | 22.57631 |          |
| 788.9394 | 10.59921 | 788.9394 | -12.4717 | 788.9394 | 23.07093 |          |
| 798.9899 | 10.80188 | 798.9899 | -12.7669 | 798.9899 | 23.56879 |          |
| 809.0404 | 11.0052  | 809.0404 | -13.0647 | 809.0404 | 24.06986 |          |
| 819.0909 | 11.20915 | 819.0909 | -13.3649 | 819.0909 | 24.57409 |          |



---

|          | T(K)     | H(eV)    | T(K)     | G(eV)    | T(K)     | TS(eV.K) |
|----------|----------|----------|----------|----------|----------|----------|
| 839.1919 | 11.6189  | 839.1919 | -13.973  | 839.1919 | 25.59188 |          |
| 849.2424 | 11.82466 | 849.2424 | -14.2807 | 849.2424 | 26.10537 |          |
| 859.2929 | 12.031   | 859.2929 | -14.5909 | 859.2929 | 26.62187 |          |
| 869.3434 | 12.2379  | 869.3434 | -14.9035 | 869.3434 | 27.14135 |          |
| 879.3939 | 12.44535 | 879.3939 | -15.2184 | 879.3939 | 27.66378 |          |
| 889.4444 | 12.65334 | 889.4444 | -15.5358 | 889.4444 | 28.18912 |          |
| 899.4949 | 12.86185 | 899.4949 | -15.8555 | 899.4949 | 28.71733 |          |
| 909.5455 | 13.07088 | 909.5455 | -16.1775 | 909.5455 | 29.2484  |          |
| 919.596  | 13.28041 | 919.596  | -16.5019 | 919.596  | 29.78228 |          |
| 929.6465 | 13.49044 | 929.6465 | -16.8285 | 929.6465 | 30.31894 |          |
| 939.697  | 13.70094 | 939.697  | -17.1574 | 939.697  | 30.85836 |          |
| 949.7475 | 13.91192 | 949.7475 | -17.4886 | 949.7475 | 31.40051 |          |
| 959.798  | 14.12336 | 959.798  | -17.822  | 959.798  | 31.94535 |          |
| 969.8485 | 14.33525 | 969.8485 | -18.1576 | 969.8485 | 32.49286 |          |
| 979.899  | 14.54758 | 979.899  | -18.4954 | 979.899  | 33.04301 |          |
| 989.9495 | 14.76035 | 989.9495 | -18.8354 | 989.9495 | 33.59577 |          |
| 1000     | 14.97354 | 1000     | -19.1776 | 1000     | 34.15113 |          |

---

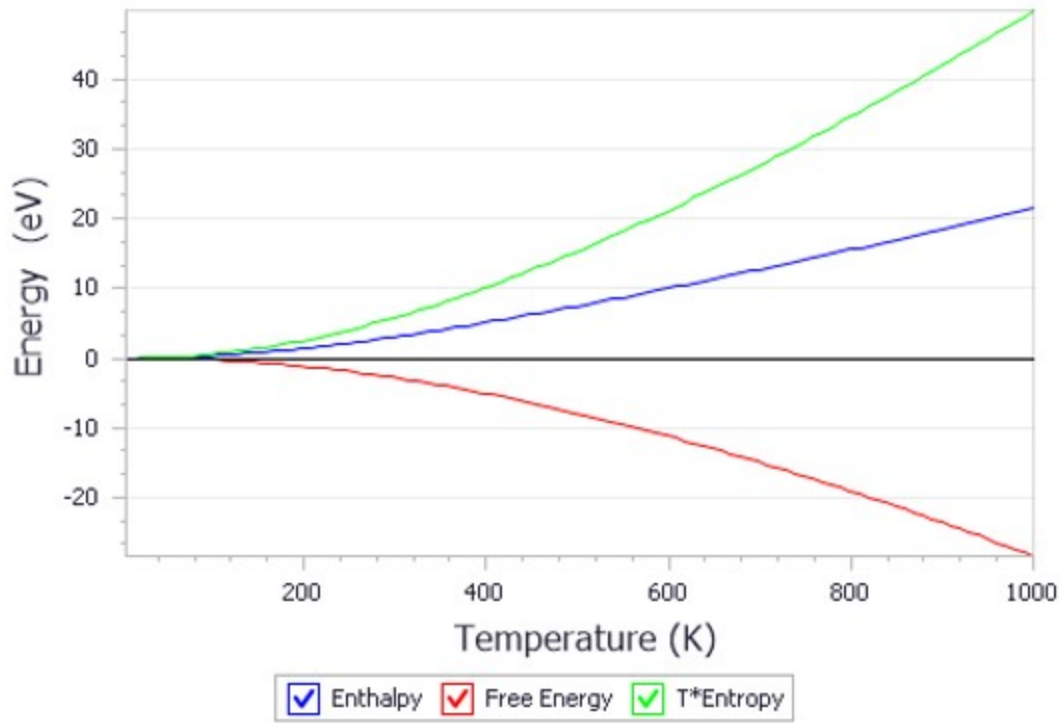

Fig 3S: Castep thermodynamic properties of SAPO-17 structure (TS<sub>1-2</sub>).

**Table 3S. Parameters of thermodynamic Castep of SAPO- 17 structure.**

| T(K)     | H( eV)   | T(K)     | G( eV)    | T(K)     | TS( eV.K) |
|----------|----------|----------|-----------|----------|-----------|
| 5        | 9.19E-05 | 5        | -2.43E-05 | 5        | 0.000116  |
| 15.05051 | 0.002871 | 15.05051 | -0.00142  | 15.05051 | 0.004292  |
| 25.10101 | 0.011259 | 25.10101 | -0.00625  | 25.10101 | 0.01751   |
| 35.15152 | 0.027124 | 35.15152 | -0.01582  | 35.15152 | 0.042941  |
| 45.20202 | 0.051347 | 45.20202 | -0.03106  | 45.20202 | 0.082412  |
| 55.25253 | 0.084162 | 55.25253 | -0.05263  | 55.25253 | 0.136796  |
| 65.30303 | 0.125495 | 65.30303 | -0.08094  | 65.30303 | 0.206436  |
| 75.35354 | 0.175184 | 75.35354 | -0.11625  | 75.35354 | 0.291432  |
| 85.40404 | 0.233061 | 85.40404 | -0.15873  | 85.40404 | 0.391788  |
| 95.45455 | 0.29897  | 95.45455 | -0.20849  | 95.45455 | 0.50746   |
| 105.5051 | 0.372751 | 105.5051 | -0.26561  | 105.5051 | 0.638358  |
| 115.5556 | 0.454234 | 115.5556 | -0.33012  | 115.5556 | 0.784355  |
| 125.6061 | 0.543233 | 125.6061 | -0.40205  | 125.6061 | 0.945283  |
| 135.6566 | 0.639547 | 135.6566 | -0.48139  | 135.6566 | 1.120941  |
| 145.7071 | 0.742961 | 145.7071 | -0.56814  | 145.7071 | 1.3111    |
| 155.7576 | 0.853257 | 155.7576 | -0.66226  | 155.7576 | 1.515513  |
| 165.8081 | 0.970213 | 165.8081 | -0.76371  | 165.8081 | 1.733919  |
| 175.8586 | 1.093608 | 175.8586 | -0.87244  | 175.8586 | 1.966051  |
| 185.9091 | 1.223227 | 185.9091 | -0.98841  | 185.9091 | 2.211637  |
| 195.9596 | 1.35886  | 195.9596 | -1.11155  | 195.9596 | 2.47041   |
| 206.0101 | 1.500304 | 206.0101 | -1.2418   | 206.0101 | 2.7421    |
| 216.0606 | 1.647365 | 216.0606 | -1.37908  | 216.0606 | 3.026447  |
| 226.1111 | 1.799856 | 226.1111 | -1.52334  | 226.1111 | 3.323192  |
| 236.1616 | 1.957598 | 236.1616 | -1.67449  | 236.1616 | 3.632083  |
| 246.2121 | 2.120416 | 246.2121 | -1.83246  | 246.2121 | 3.952873  |
| 256.2626 | 2.288144 | 256.2626 | -1.99718  | 256.2626 | 4.285321  |
| 266.3131 | 2.460622 | 266.3131 | -2.16857  | 266.3131 | 4.62919   |
| 276.3636 | 2.637693 | 276.3636 | -2.34656  | 276.3636 | 4.984251  |
| 286.4141 | 2.819207 | 286.4141 | -2.53107  | 286.4141 | 5.350275  |
| 296.4646 | 3.005018 | 296.4646 | -2.72202  | 296.4646 | 5.727041  |
| 306.5152 | 3.194983 | 306.5152 | -2.91935  | 306.5152 | 6.114332  |
| 316.5657 | 3.388964 | 316.5657 | -3.12297  | 316.5657 | 6.511935  |
| 326.6162 | 3.586828 | 326.6162 | -3.33281  | 326.6162 | 6.919641  |
| 336.6667 | 3.788442 | 336.6667 | -3.5488   | 336.6667 | 7.337246  |
| 346.7172 | 3.993682 | 346.7172 | -3.77087  | 346.7172 | 7.764549  |
| 356.7677 | 4.202423 | 356.7677 | -3.99893  | 356.7677 | 8.201354  |
| 366.8182 | 4.414546 | 366.8182 | -4.23292  | 366.8182 | 8.64747   |
| 376.8687 | 4.629935 | 376.8687 | -4.47277  | 376.8687 | 9.102709  |
| 386.9192 | 4.848477 | 386.9192 | -4.71841  | 386.9192 | 9.566888  |

| T(K)     | H(eV)    | T(K)     | G(eV)    | T(K)     | TS(eV.K) |
|----------|----------|----------|----------|----------|----------|
| 417.0707 | 5.521952 | 417.0707 | -5.48935 | 417.0707 | 11.0113  |
| 427.1212 | 5.752053 | 427.1212 | -5.75744 | 427.1212 | 11.50949 |
| 437.1717 | 5.984798 | 437.1717 | -6.03098 | 437.1717 | 12.01578 |
| 447.2222 | 6.220093 | 447.2222 | -6.3099  | 447.2222 | 12.52999 |
| 457.2727 | 6.457852 | 457.2727 | -6.59414 | 457.2727 | 13.05199 |
| 467.3232 | 6.697988 | 467.3232 | -6.88363 | 467.3232 | 13.58161 |
| 477.3737 | 6.940419 | 477.3737 | -7.1783  | 477.3737 | 14.11872 |
| 487.4242 | 7.185067 | 487.4242 | -7.47811 | 487.4242 | 14.66318 |
| 497.4747 | 7.431855 | 497.4747 | -7.78298 | 497.4747 | 15.21484 |
| 507.5253 | 7.68071  | 507.5253 | -8.09286 | 507.5253 | 15.77357 |
| 517.5758 | 7.931562 | 517.5758 | -8.40769 | 517.5758 | 16.33925 |
| 527.6263 | 8.184343 | 527.6263 | -8.72741 | 527.6263 | 16.91175 |
| 537.6768 | 8.438988 | 537.6768 | -9.05196 | 537.6768 | 17.49095 |
| 547.7273 | 8.695435 | 547.7273 | -9.38129 | 547.7273 | 18.07672 |
| 557.7778 | 8.953625 | 557.7778 | -9.71534 | 557.7778 | 18.66896 |
| 567.8283 | 9.213499 | 567.8283 | -10.0541 | 567.8283 | 19.26755 |
| 577.8788 | 9.475002 | 577.8788 | -10.3974 | 577.8788 | 19.87239 |
| 587.9293 | 9.738083 | 587.9293 | -10.7453 | 587.9293 | 20.48336 |
| 597.9798 | 10.00269 | 597.9798 | -11.0977 | 597.9798 | 21.10037 |
| 608.0303 | 10.26877 | 608.0303 | -11.4545 | 608.0303 | 21.72332 |
| 618.0808 | 10.53629 | 618.0808 | -11.8158 | 618.0808 | 22.35211 |
| 628.1313 | 10.80518 | 628.1313 | -12.1815 | 628.1313 | 22.98664 |
| 638.1818 | 11.07542 | 638.1818 | -12.5514 | 638.1818 | 23.62684 |
| 648.2323 | 11.34697 | 648.2323 | -12.9256 | 648.2323 | 24.27259 |
| 658.2828 | 11.61977 | 658.2828 | -13.3041 | 658.2828 | 24.92383 |
| 668.3333 | 11.89379 | 668.3333 | -13.6867 | 668.3333 | 25.58047 |
| 678.3838 | 12.169   | 678.3838 | -14.0734 | 678.3838 | 26.24242 |
| 688.4343 | 12.44537 | 688.4343 | -14.4642 | 688.4343 | 26.90961 |
| 698.4848 | 12.72285 | 698.4848 | -14.8591 | 698.4848 | 27.58196 |
| 708.5354 | 13.00141 | 708.5354 | -15.258  | 708.5354 | 28.25939 |
| 718.5859 | 13.28102 | 718.5859 | -15.6608 | 718.5859 | 28.94184 |
| 728.6364 | 13.56166 | 728.6364 | -16.0676 | 728.6364 | 29.62922 |
| 738.6869 | 13.8433  | 738.6869 | -16.4782 | 738.6869 | 30.32148 |
| 748.7374 | 14.1259  | 748.7374 | -16.8926 | 748.7374 | 31.01854 |
| 758.7879 | 14.40943 | 758.7879 | -17.3109 | 758.7879 | 31.72035 |
| 768.8384 | 14.69389 | 768.8384 | -17.7329 | 768.8384 | 32.42682 |
| 778.8889 | 14.97923 | 778.8889 | -18.1587 | 778.8889 | 33.13791 |
| 788.9394 | 15.26543 | 788.9394 | -18.5881 | 788.9394 | 33.85356 |
| 798.9899 | 15.55248 | 798.9899 | -19.0212 | 798.9899 | 34.57369 |
| 809.0404 | 15.84034 | 809.0404 | -19.4579 | 809.0404 | 35.29826 |
| 819.0909 | 16.12901 | 819.0909 | -19.8982 | 819.0909 | 36.02721 |

| T(K)     | H( eV)   | T(K)     | G( eV)   | T(K)     | TS( eV.K) |
|----------|----------|----------|----------|----------|-----------|
| 839.1919 | 16.70864 | 839.1919 | -20.7894 | 839.1919 | 37.49803  |
| 849.2424 | 16.99958 | 849.2424 | -21.2402 | 849.2424 | 38.23979  |
| 859.2929 | 17.29123 | 859.2929 | -21.6945 | 859.2929 | 38.98572  |
| 869.3434 | 17.58359 | 869.3434 | -22.1522 | 869.3434 | 39.73576  |
| 879.3939 | 17.87663 | 879.3939 | -22.6132 | 879.3939 | 40.48988  |
| 889.4444 | 18.17033 | 889.4444 | -23.0777 | 889.4444 | 41.24801  |
| 899.4949 | 18.46469 | 899.4949 | -23.5454 | 899.4949 | 42.01011  |
| 909.5455 | 18.75968 | 909.5455 | -24.0165 | 909.5455 | 42.77615  |
| 919.596  | 19.0553  | 919.596  | -24.4908 | 919.596  | 43.54606  |
| 929.6465 | 19.35151 | 929.6465 | -24.9683 | 929.6465 | 44.31982  |
| 939.697  | 19.64832 | 939.697  | -25.4491 | 939.697  | 45.09737  |
| 949.7475 | 19.94571 | 949.7475 | -25.933  | 949.7475 | 45.87868  |
| 959.798  | 20.24366 | 959.798  | -26.42   | 959.798  | 46.6637   |
| 969.8485 | 20.54216 | 969.8485 | -26.9102 | 969.8485 | 47.4524   |
| 979.899  | 20.84119 | 979.899  | -27.4035 | 979.899  | 48.24473  |
| 989.9495 | 21.14076 | 989.9495 | -27.8999 | 989.9495 | 49.04065  |
| 1000     | 21.44084 | 1000     | -28.3993 | 1000     | 49.84014  |
